# Supplementary material for: Composition and Niche-Specific Characteristics of Microbial Consortia Colonizing Marsberg Copper Mine in the Rhenish Massif
Source: Copernicus journal article supplement (doi:10.5194/bg-2021-165), 2021-07-22
Supplement: Supplementary file 1 [file bg-2021-165-supplement.pdf]

# **Composition and Niche-Specific Characteristics of Microbial Consortia colonizing a Copper Mine in the Rhenish Massif**

## **Supplementary Information**

Sania Arif<sup>1</sup>, Heiko Nacke<sup>2</sup>, Elias Schliekmann<sup>1</sup>, Andreas Reimer<sup>3</sup>, Gernot Arp<sup>3</sup>, and Michael Hoppert<sup>1</sup>

<sup>1</sup>Department of General Microbiology, Institute of Microbiology and Genetics,

<sup>2</sup>Department of Genomic and Applied Microbiology, Institute of Microbiology and Genetics,

<sup>3</sup>Geoscience Centre, Department of Geobiology, Georg-August-Universität Göttingen, Germany

\*Correspondence to [sarif@gwdg.de](mailto:sarif@gwdg.de)

**Figure S1, Figure S2, Figure S3, Figure S4, Figure S5, Figure S6, Figure S7, Table S1, Table S2**

*Supplementary Information*

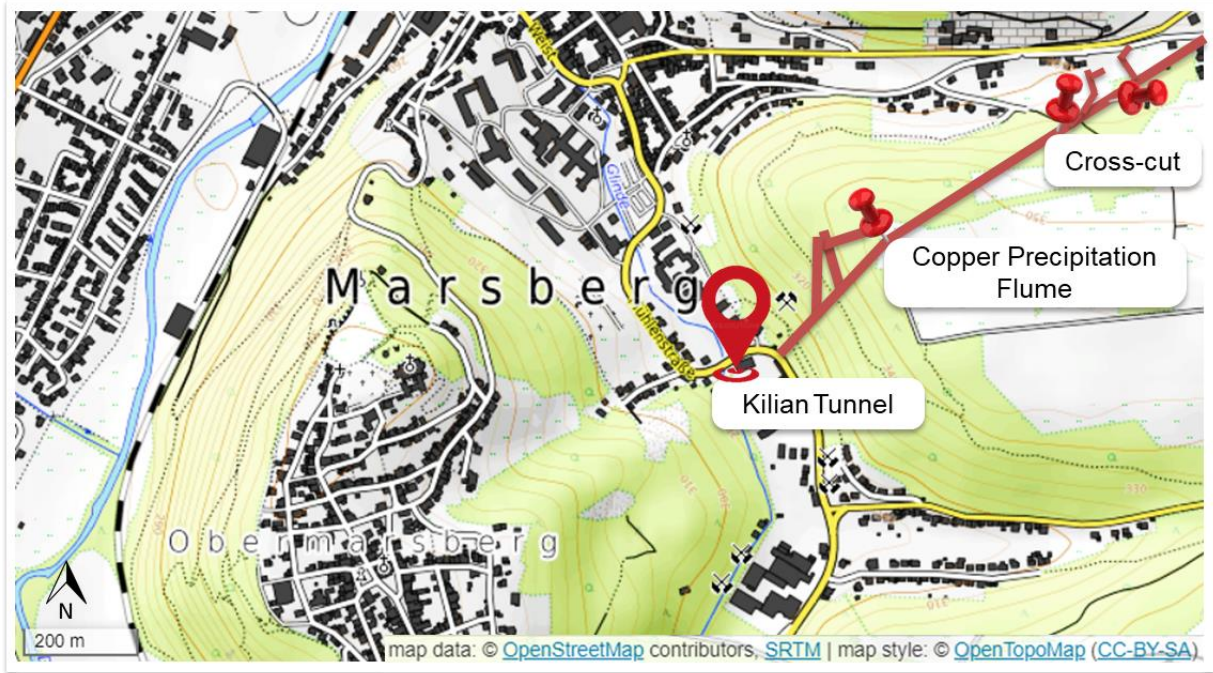

**Figure S1.** Map of sampling site (Kilianstollen, Marsberg) in the Rhenish Massif mountain range. Reproduced from OpenTopoMap (<https://opentopomap.org/>), under creative common license CC BY-SA 3.0 (<https://creativecommons.org/licenses/by-sa/3.0/legalcode>), the map was subsequently modified with the sampling sites (red pushpins) and simplified underground Kilian copper mine adit.

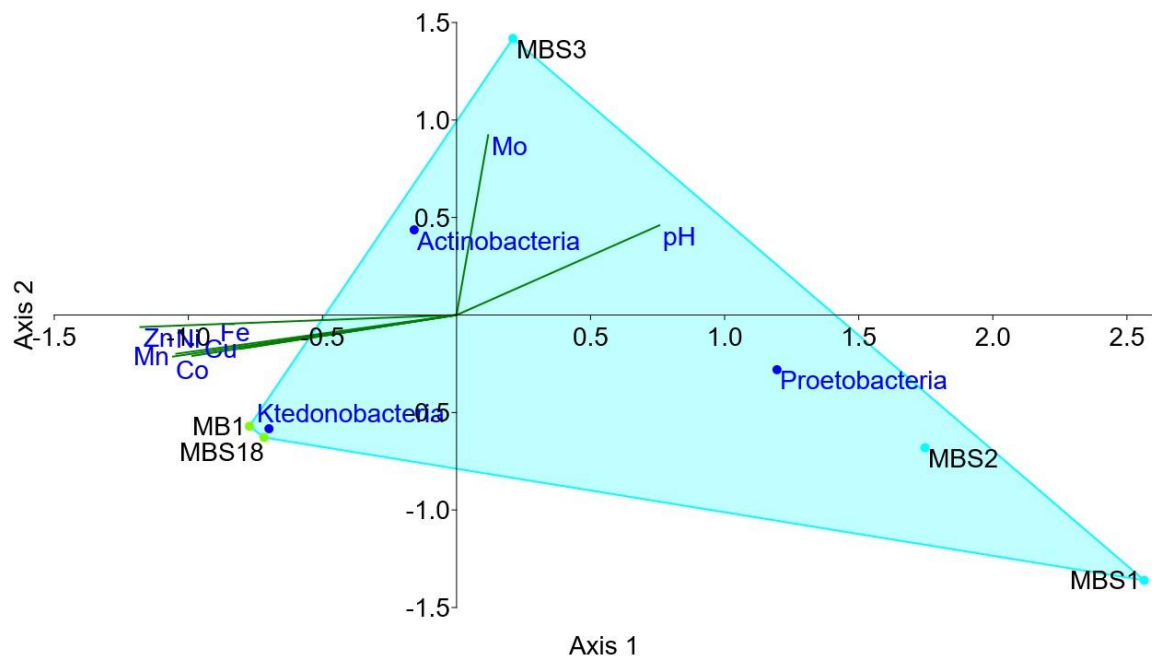

**Figure S2.** Canonical correspondence analysis of the biological samples collected at the leachate and spring water site. The heavy metals concentrations were taken as the abiotic factors against the abundance of *Proteobacteria*, *Actinobacteria*, and *Ktedonobacteria* for the representative of leachate (MB1, MBS18) and spring water (MBS1, MBS2, MBS3) groups.

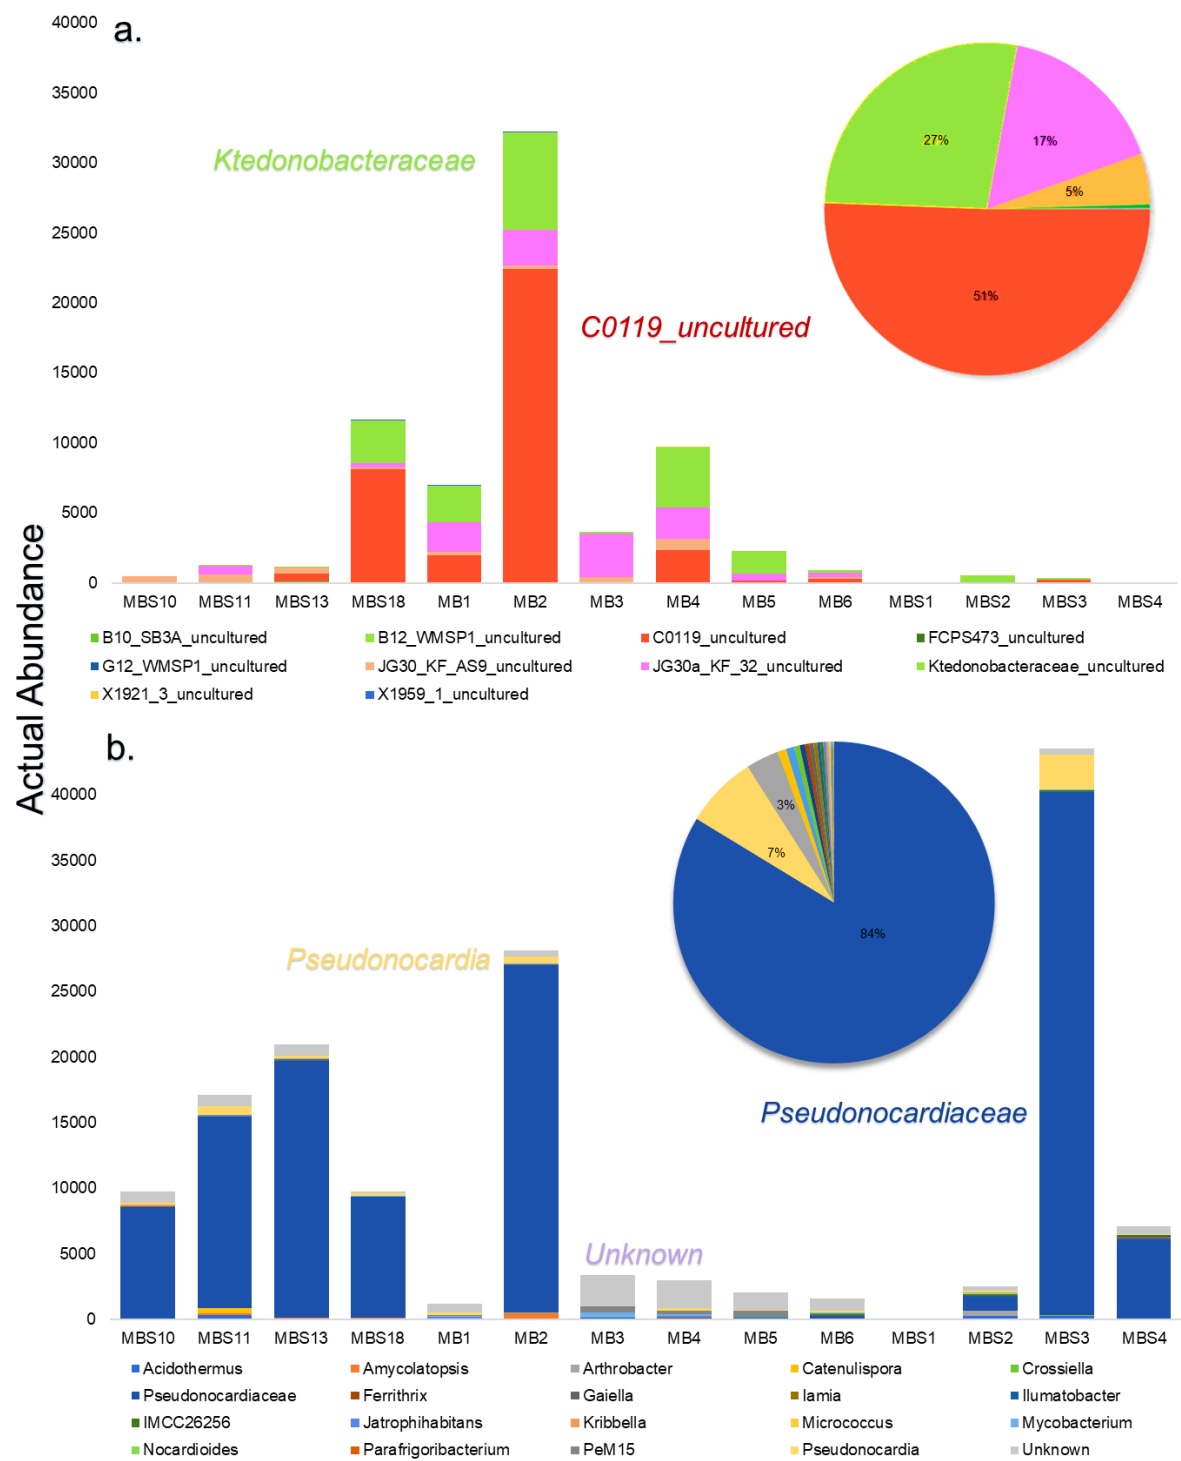

32

33 **Figure S3.** Actual abundance of *Ktedonobacteria* and *Actinobacteria* OTUs at genus level. The actual  
34 abundance of OTUs belonging to *Ktedonobacteria* (a) and *Actinobacteria* (b) class were observed at genus level,  
35 without any normalization, to analyse the low abundant OTUs. The pie chart insert shows the overall abundance  
36 of the major genus OTUs.

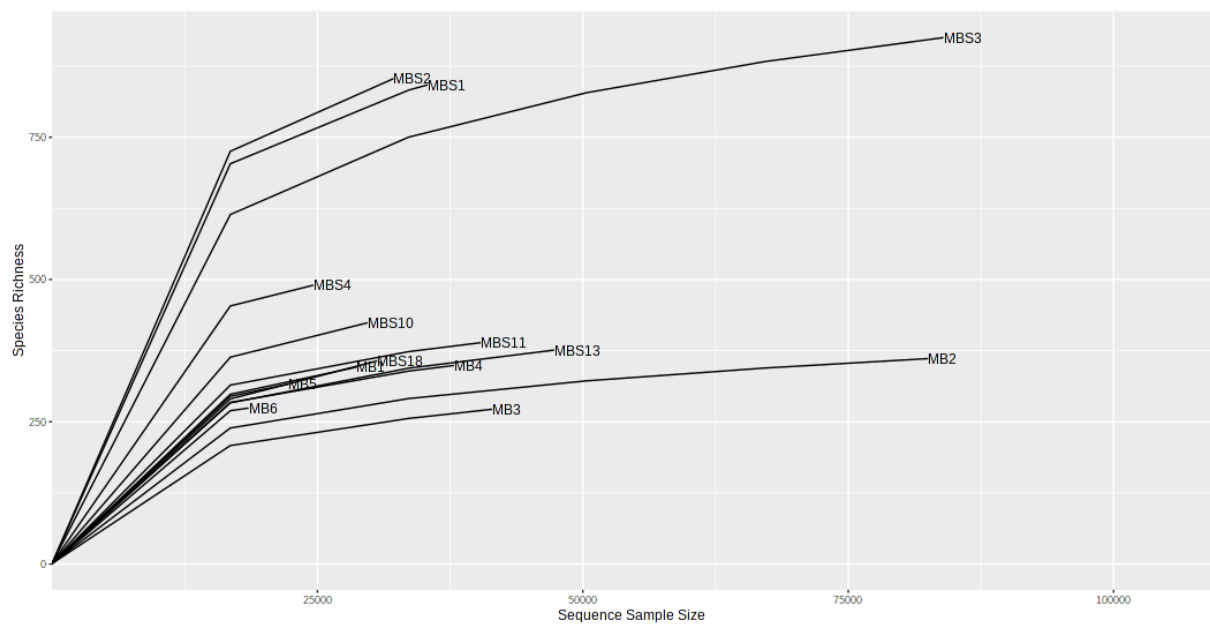

39 **Figure S4. Rarefaction Curve Analysis.** The samples are plotted in terms of OTUs observed (species richness)  
40 and sampled reads (sequence sample size).

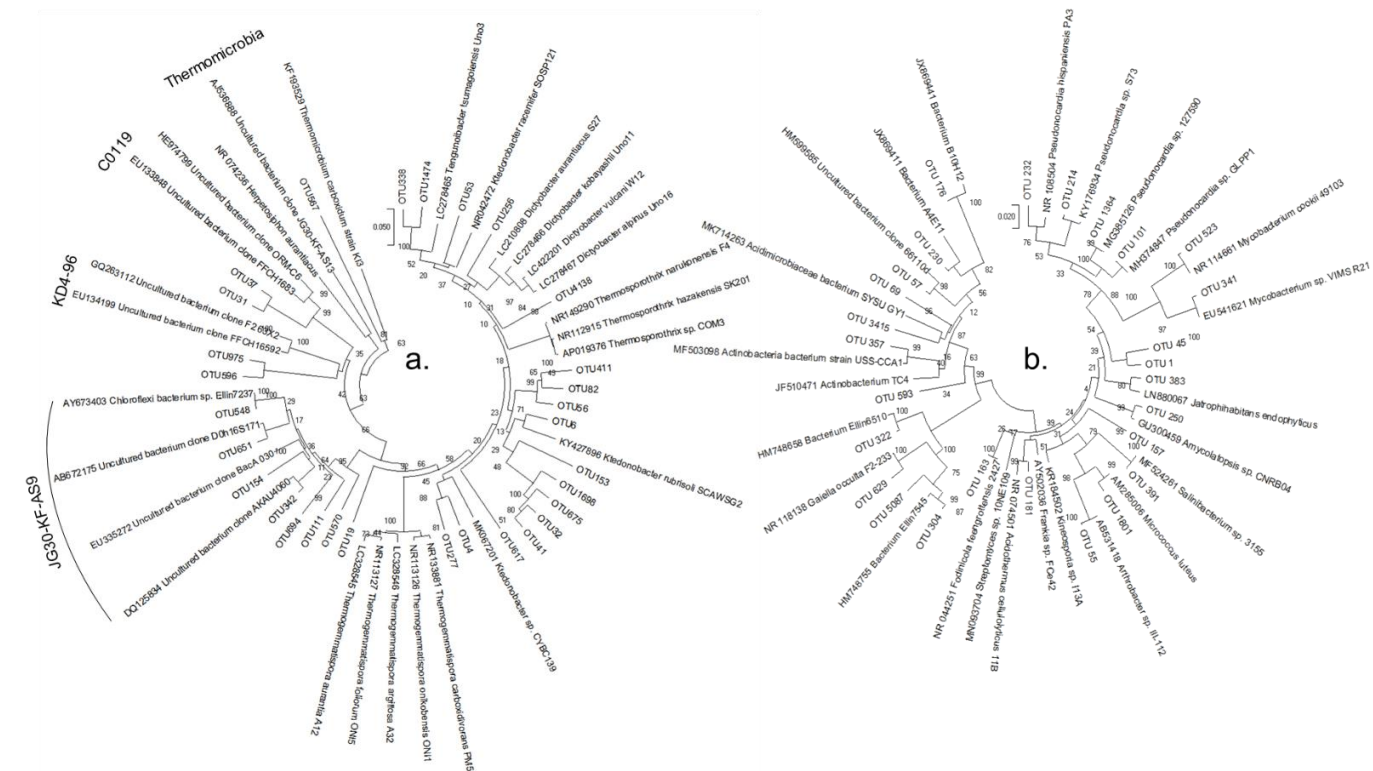

42 **Figure S5. Phylogenetic tree of the small subunit SSU ribosomal RNA genes of OTUs. *Ktedonobacteria* (a)**  
43 **and *Actinobacteria* (b).** Maximum-likelihood phylogenetic tree constructed based on V3-V4 amplicon  
44 sequences OTUs of *Ktedonobacteria* 16S rRNA gene (a) with the validly published *Ktedonobacteria* species.  
45 For the *Actinobacteria* class OTUs (b), the highest blast hits sequences were used. Bootstrap values are given at  
46 the branching points.

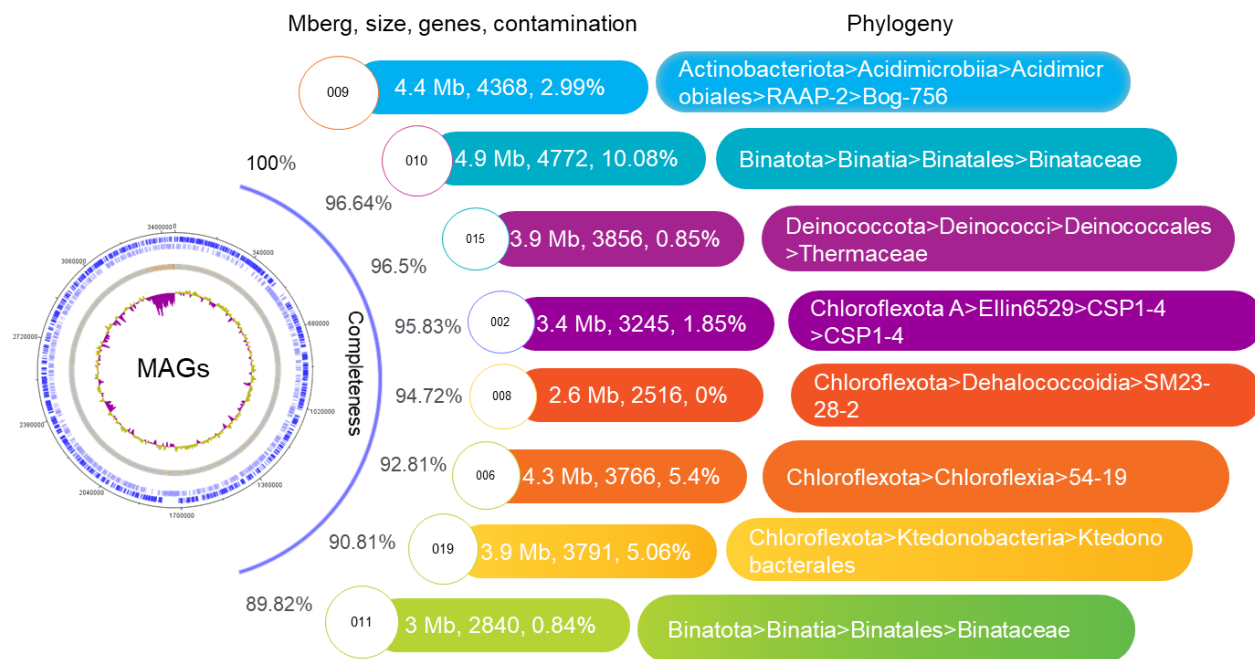

**Figure S6.** Overview of metagenome-assembled genomes and their key features

**Table S1.** Alpha diversity indexes of the Marsberg environmental samples

|                 | p-value: [ANOVA] | F-value |
|-----------------|------------------|---------|
| Chao1           | 0.00030265       | 18.499  |
| ACE             | 0.0002466        | 19.409  |
| Shannon p-value | 0.025179         | 5.242   |

**Table S2.** Analysis of molecular variance and unifrac analysis of the Marsberg samples

| Unifrac.weighted |        |          |        |  |
|------------------|--------|----------|--------|--|
| Tree#            | Groups | UWScore  | UWSig  |  |
| 1                | L-M    | 0.953519 | 0.0970 |  |
| 1                | L-W    | 0.980299 | 0.0340 |  |
| 1                | M-W    | 0.981865 | 0.1450 |  |

**AMOVA (Analysis of Molecular Variance)**

|       | Among   | Within  | Total   |
|-------|---------|---------|---------|
| L-M-W |         |         |         |
| SS    | 1.37542 | 2.93434 | 4.30976 |
| df    | 2       | 11      | 13      |

66 MS 0.687712 0.266758

67

68 Fs: 2.57803

69 p-value: <0.001\*

70

71 L-M Among Within Total

72 SS 0.331903 1.82319 2.15509

73 df 1 8 9

74 MS 0.331903 0.227898

75

76 Fs: 1.45637

77 p-value: 0.077

78

79 L-W Among Within Total

80 SS 0.979114 2.52913 3.50824

81 df 1 9 10

82 MS 0.979114 0.281014

83

84 Fs: 3.48422

85 p-value: 0.002\*

86

87 M-W Among Within Total

88 SS 0.738092 1.51637 2.25446

89 df 1 5 6

90 MS 0.738092 0.303274

91

92 Fs: 2.43375

93 p-value: 0.024

94 **L Leachate M unconsolidated rocks W Spring water**

95

96

97

98

99

100

101

102

103

104

105
